# Supplementary material for: Transfer hydrogenation and hydration of aromatic aldehydes and nitriles using heterogeneous NiO nanofibers as a catalyst
Source: Royal Society of Chemistry journal article supplement (doi:10.1039/c8nj03433h), 2018-01-01

## New Journal of Chemistry

### Supplementary Information for:

# Transfer Hydrogenation and Hydration of Aromatic Aldehydes and Nitriles Using Heterogeneous NiO Nanofibers as a Catalyst

S. Thenmozhi<sup>a</sup> and K.Kadirvelu<sup>a,\*</sup>

<sup>a</sup>DRDO-BU Centre for Life Sciences, Bharathiar University Campus, Coimbatore – 641 046, India.  
Coimbatore – 641 046, India.

\*Corresponding Author E-mail: [kadirvelukrishna@yahoo.com](mailto:kadirvelukrishna@yahoo.com)

Tel: +91-0422-2428156

Fax: +91-0422-2425459

## Table of Contents

|                                                |                  |
|------------------------------------------------|------------------|
| Figure S1. TGA curve .....                     | page 2           |
| Figure S2. Plot of pore size distribution..... | page 2           |
| <b>Spectra for Compounds.....</b>              | <b>page 2-13</b> |
| Compound 1a-2g Mass spectrum .....             | page 3-9         |
| Compound 1a-2g Gas chromatogram.....           | page 10-15       |

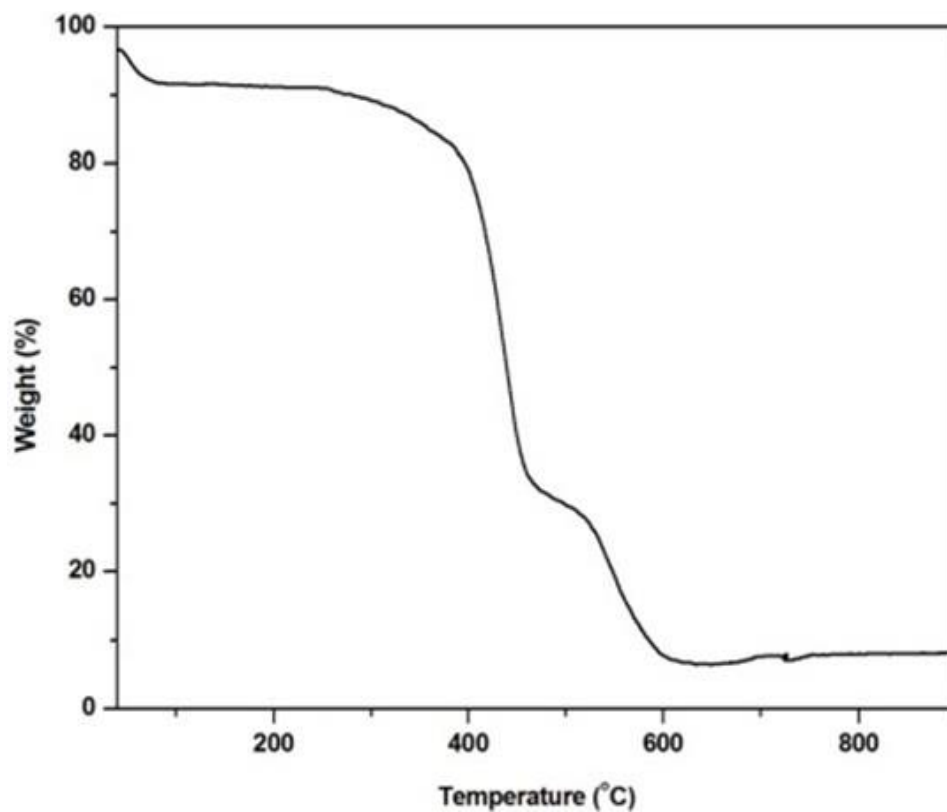

Figure S1. TGA curve of Composite NFs

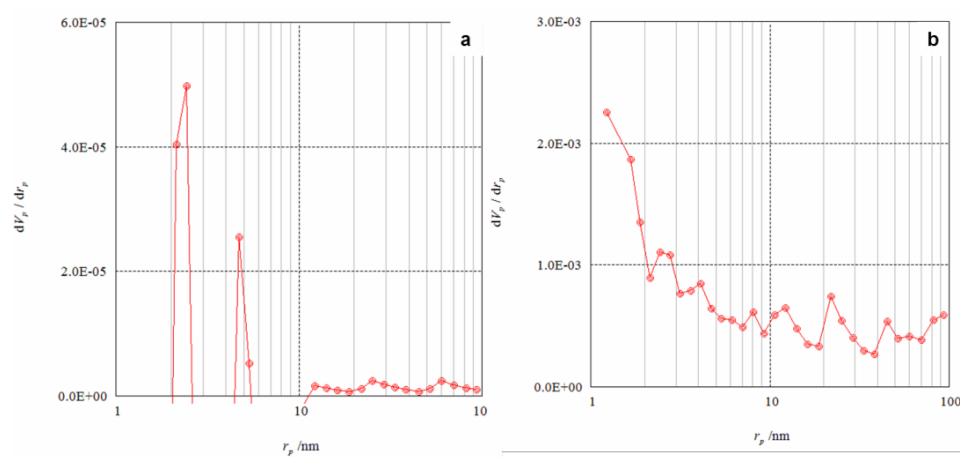

Figure S2. Plot of pore size distribution of (a) Composite and (b) NiO NFs

## GC-MS spectra of Hydrogenated and Hydrated Products

Compound 1a (2-Chlorobenzenemethanol)

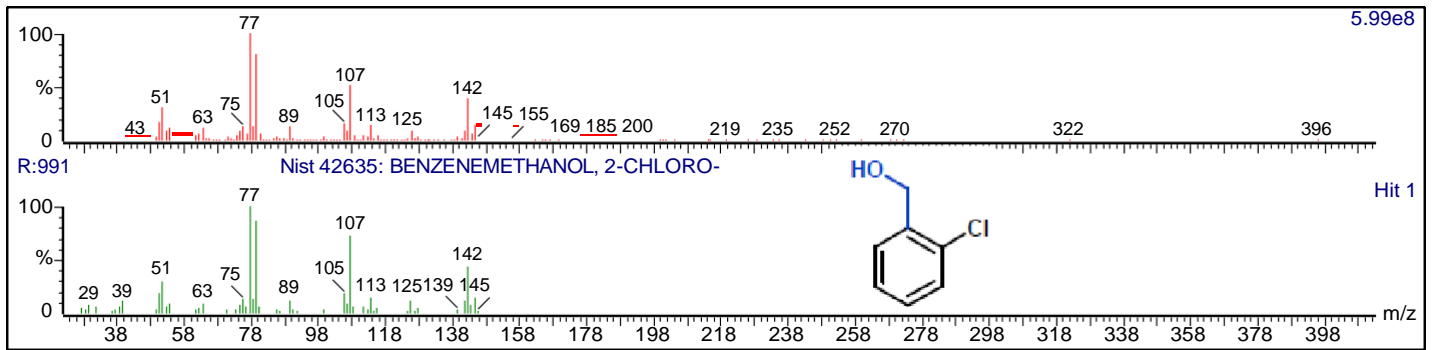

Compound 1b (2-Bromobenzenemethanol)

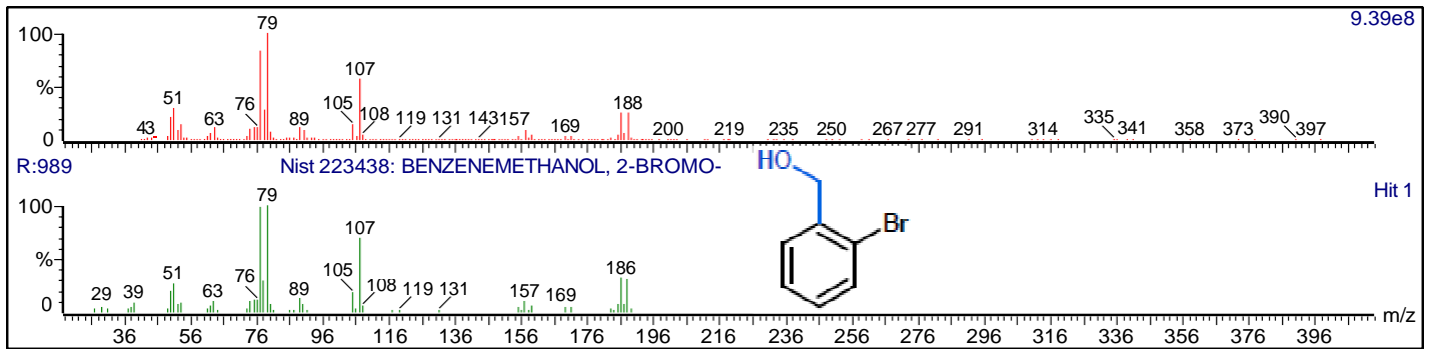

Compound 1c (2-Fluorobenzenemethanol)

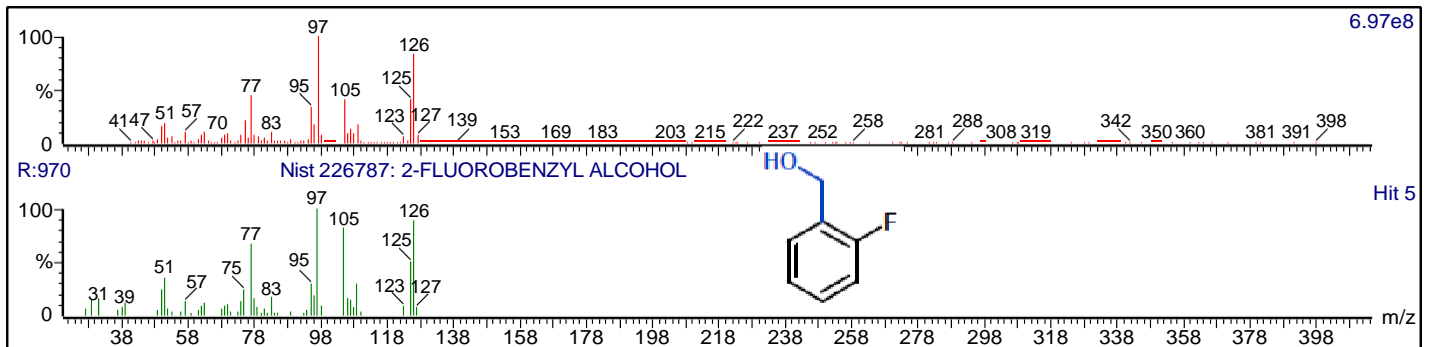

Compound 1d (3-Bromobenzenemethanol)

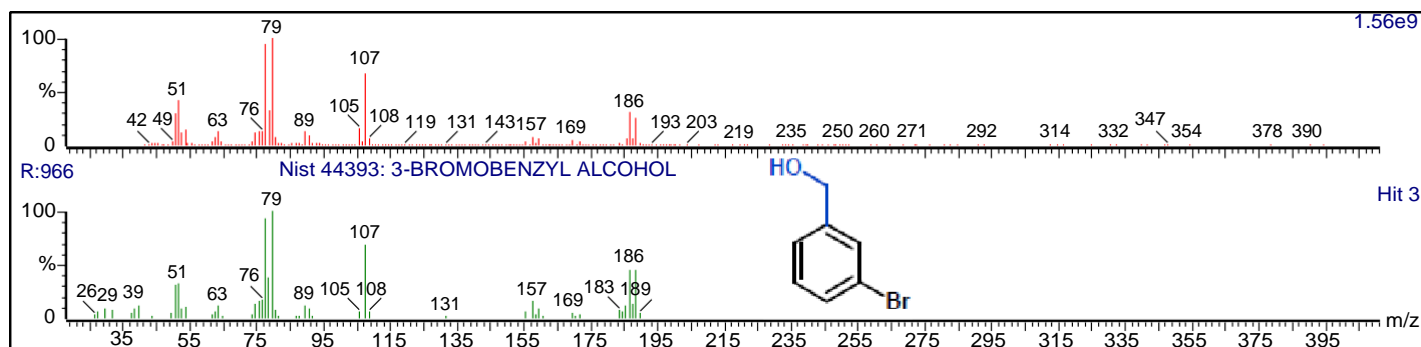

Compound 1g (3-Fluorobenzenemethanol)

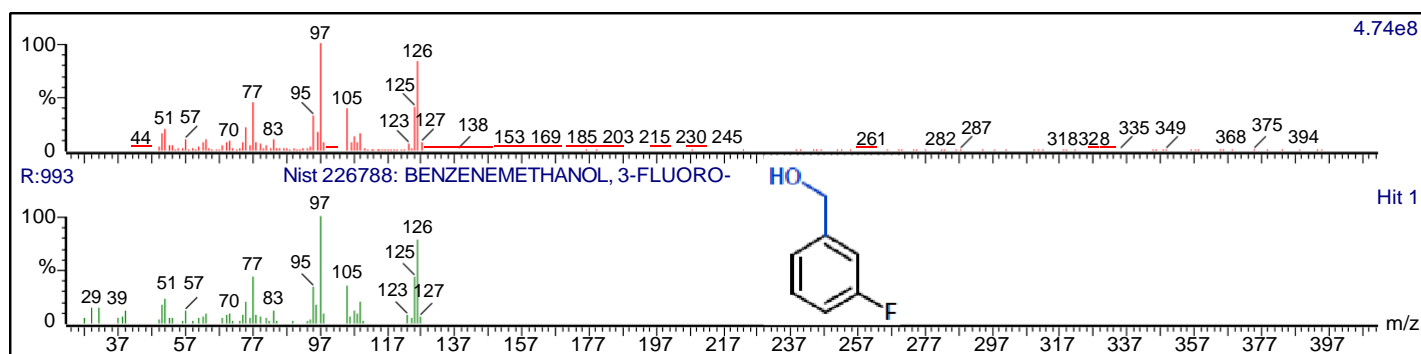

Compound 1f (4-Fluorobenzenemethanol)

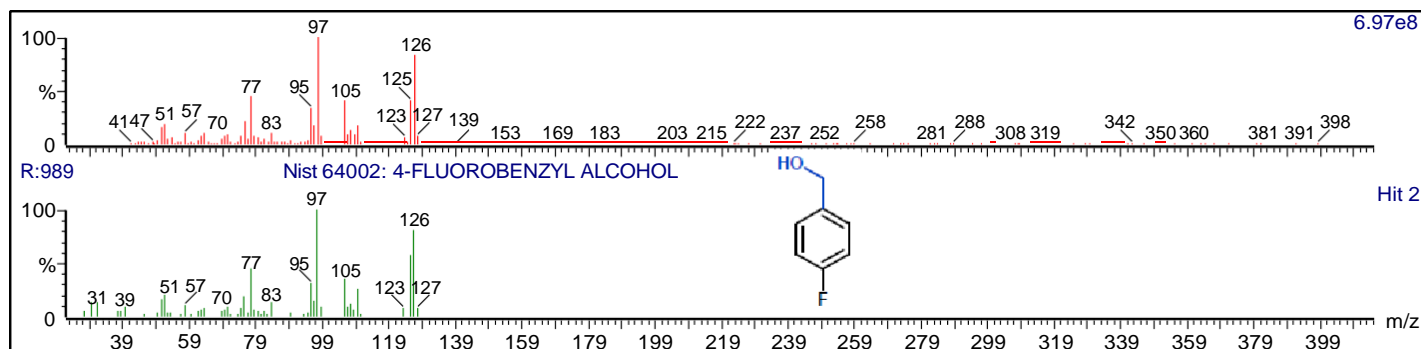

Compound 1e (4-Bromobenzenemethanol)

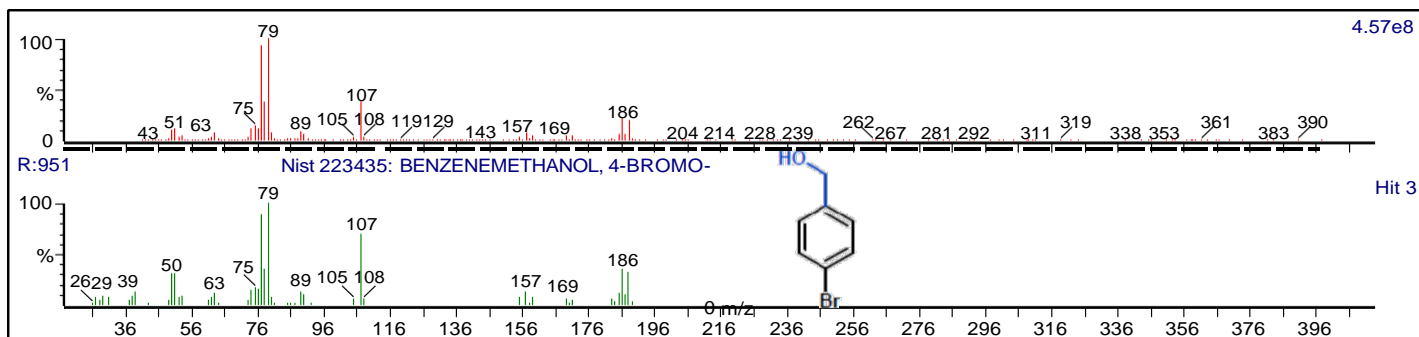

Compound 1i (3-Methylbenzenemethanol)

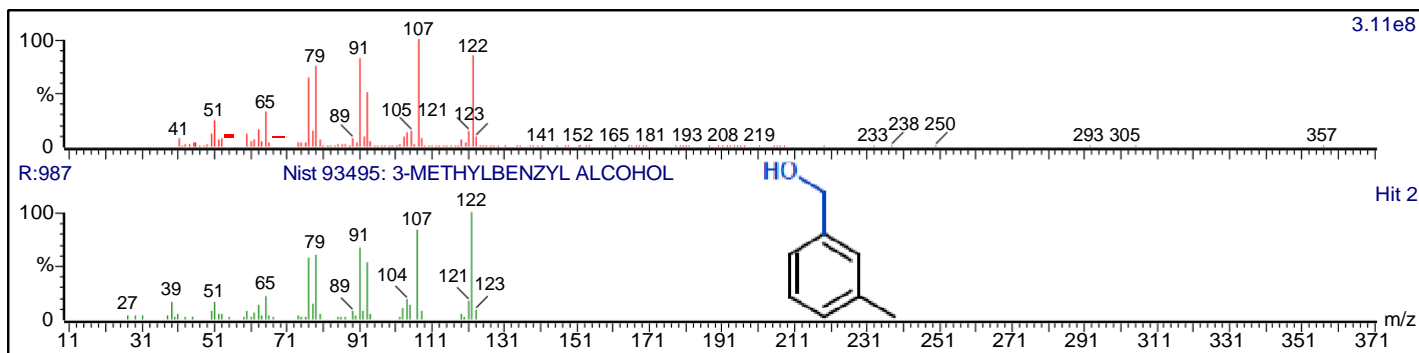

Compound 1h (4-Methylbenzenemethanol)

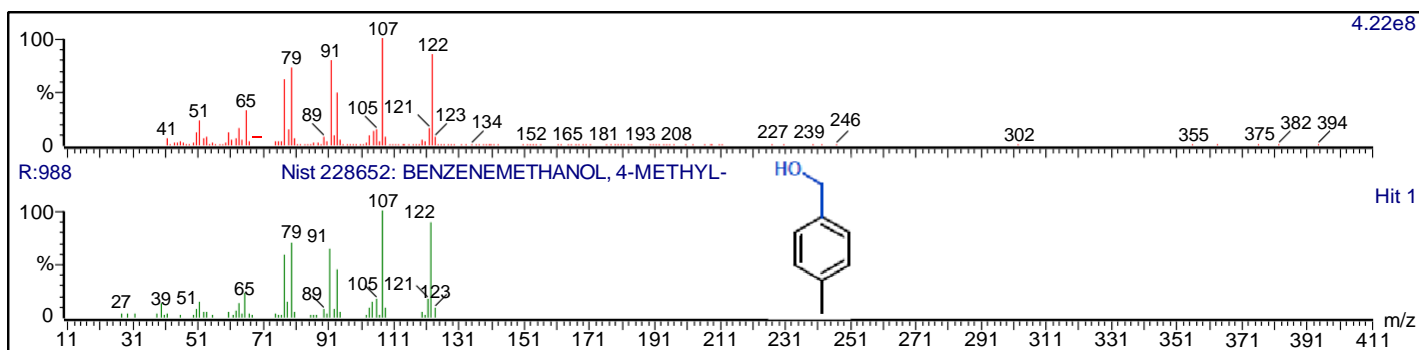

Compound 1k (4-Methoxybenzenemethanol)

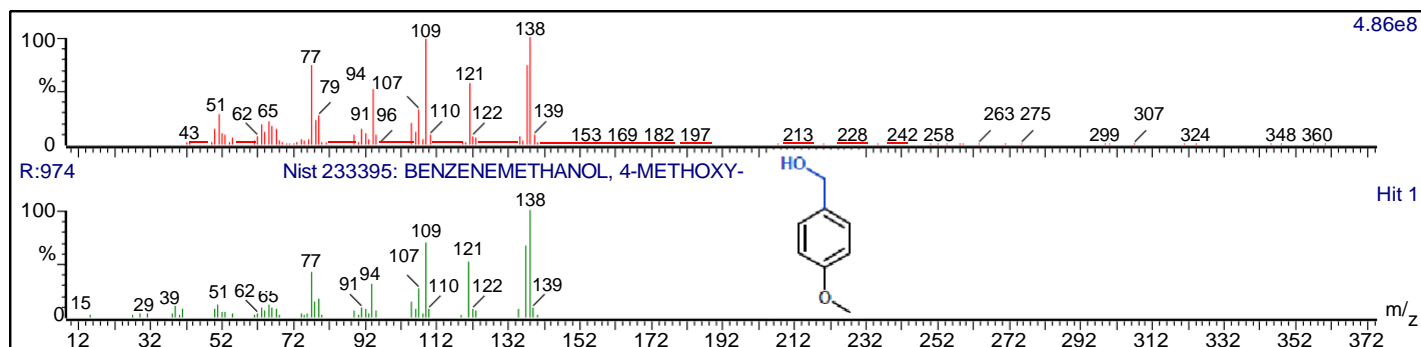

Compound 1j (3-Methoxybenzenemethanol)

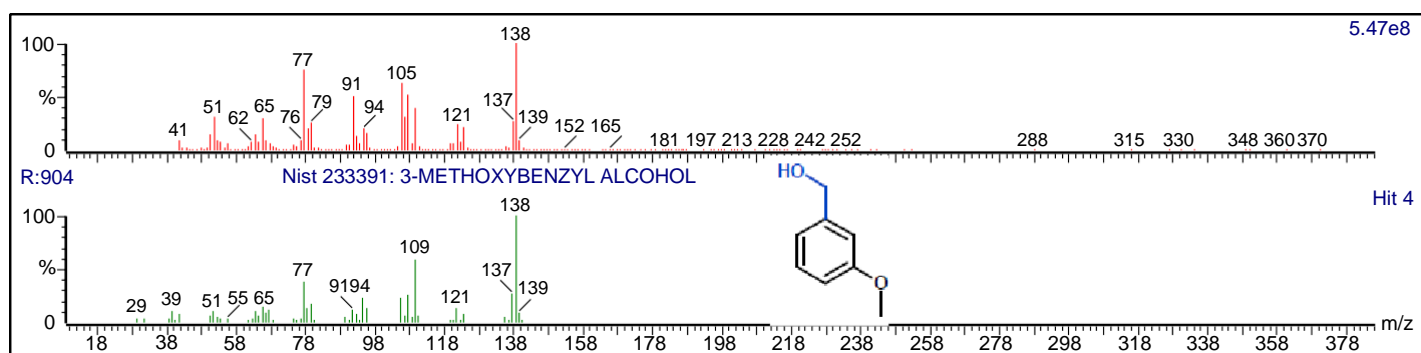

Compound 1l (2-Methoxybenzenemethanol)

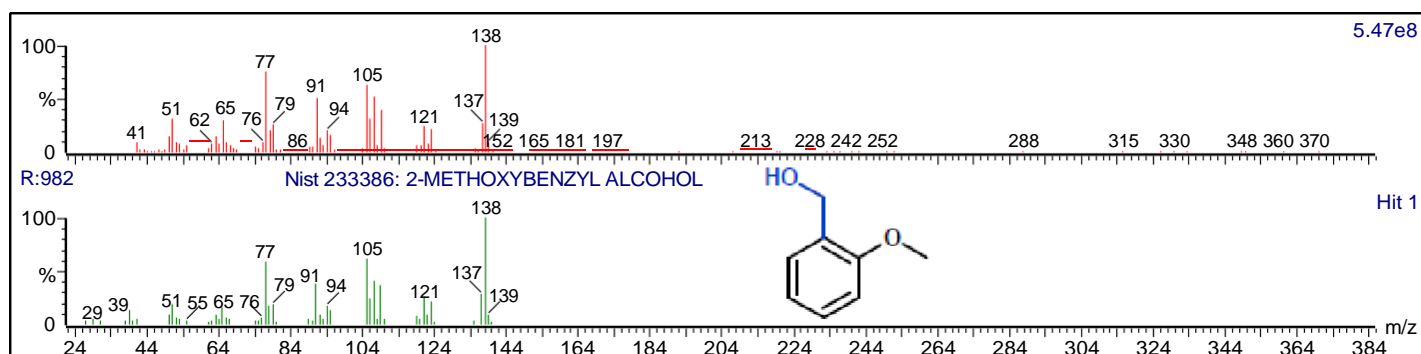

Compound 1m (2,4-Dimethoxybenzenemethanol)

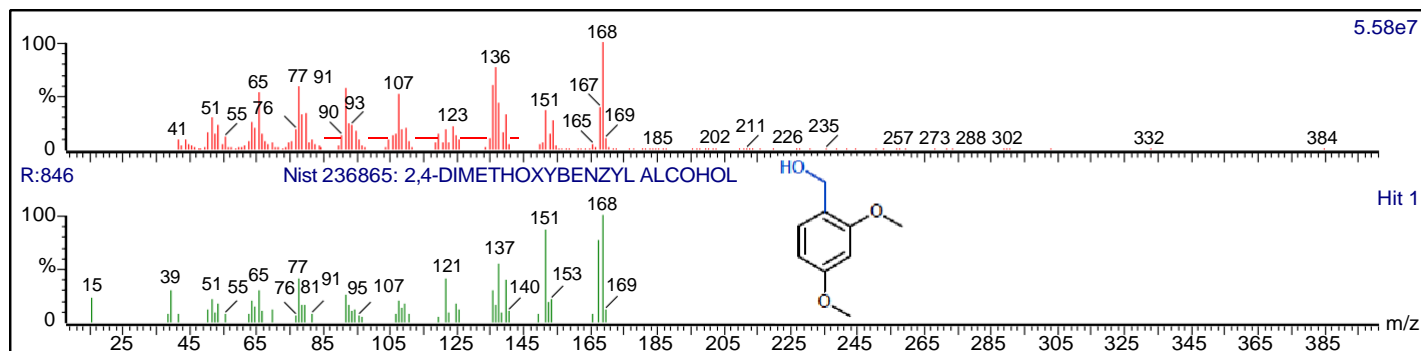

Compound 2a (Benzamide)

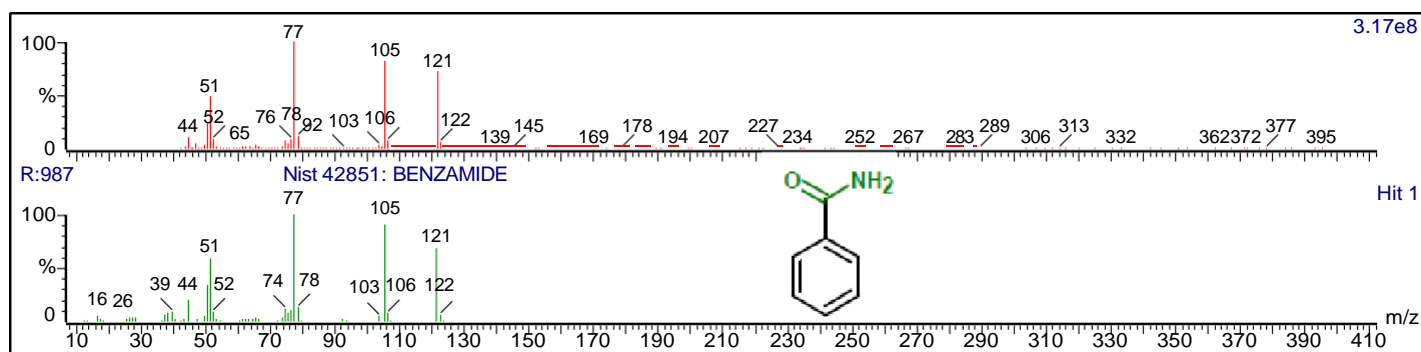

Compound 2e (2-Fluorobenzamide)

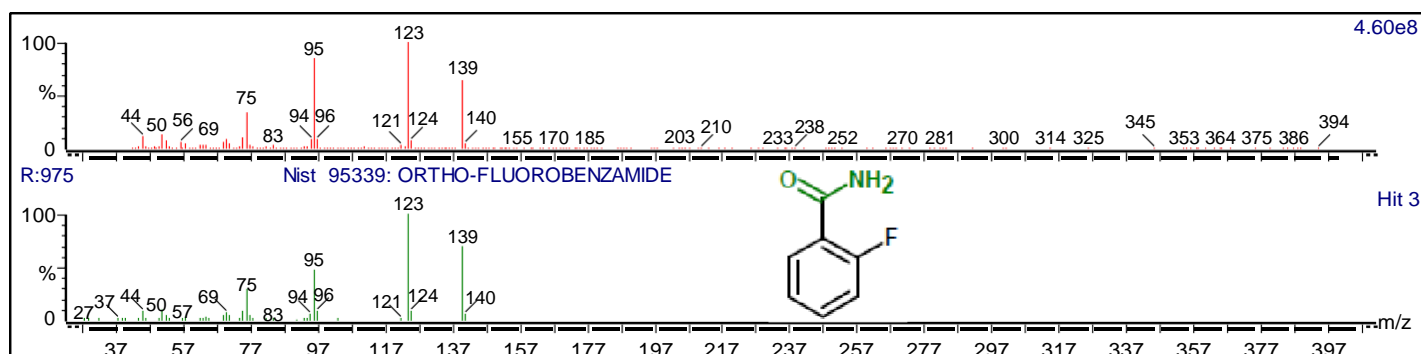

Compound 2f (4-Fluorobenzamide )

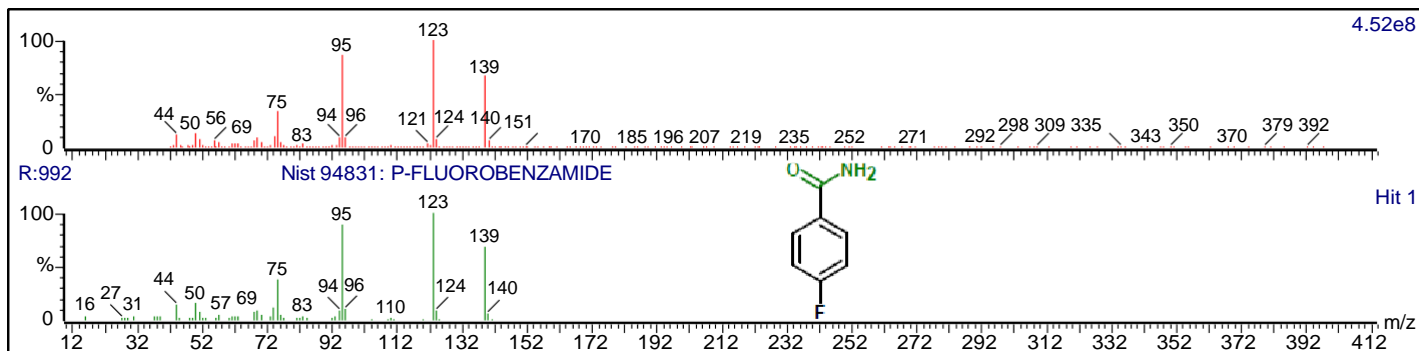

4-Chlorobenzamide

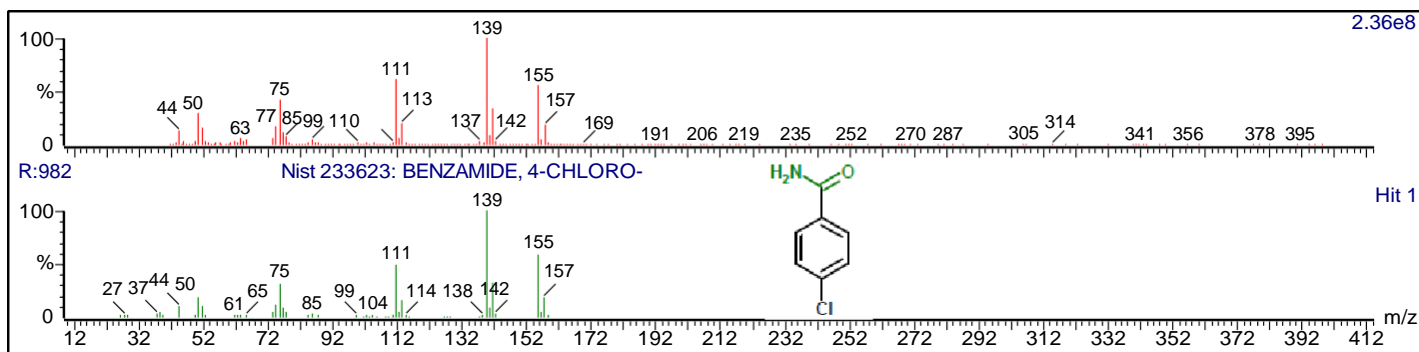

Compound 2b (2-Chlorobenzamide)

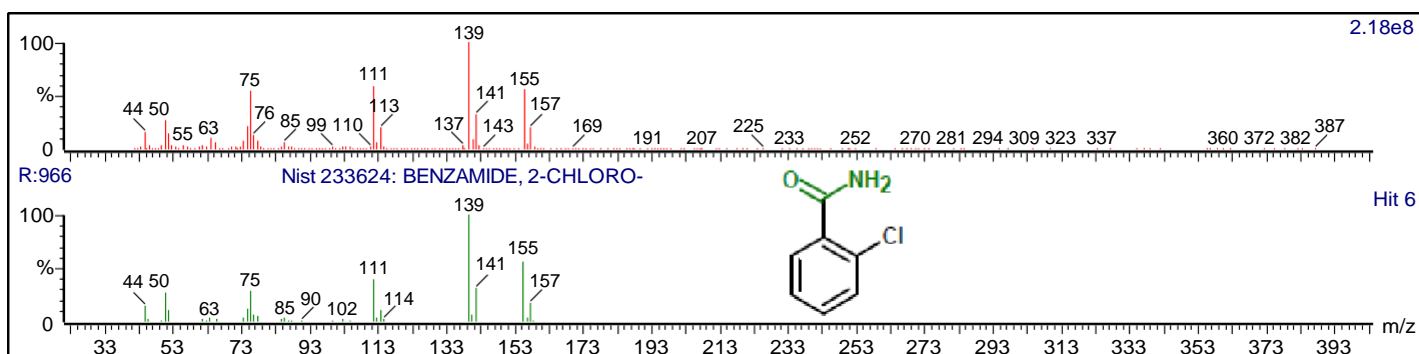



Compound 2c (3-Chlorobenzamide)

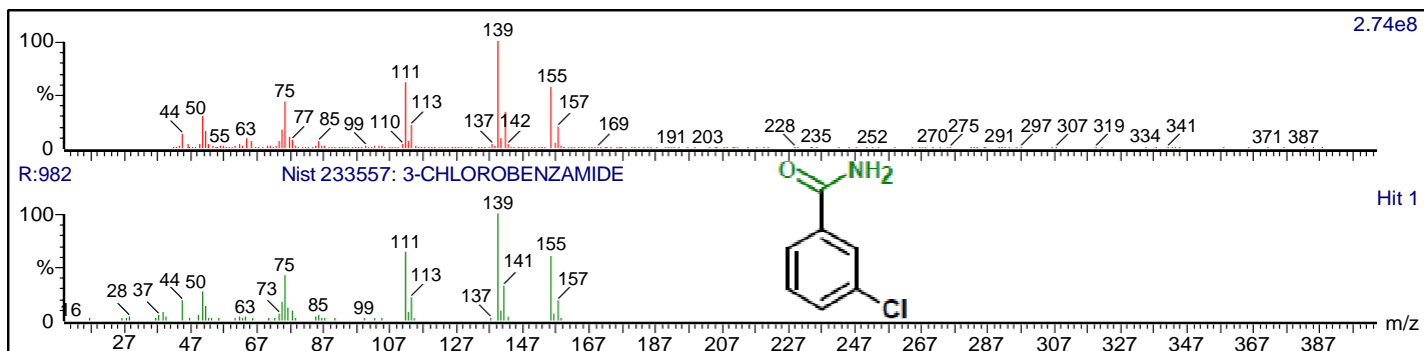

Compound 2g (2-Nitrobenzamide)

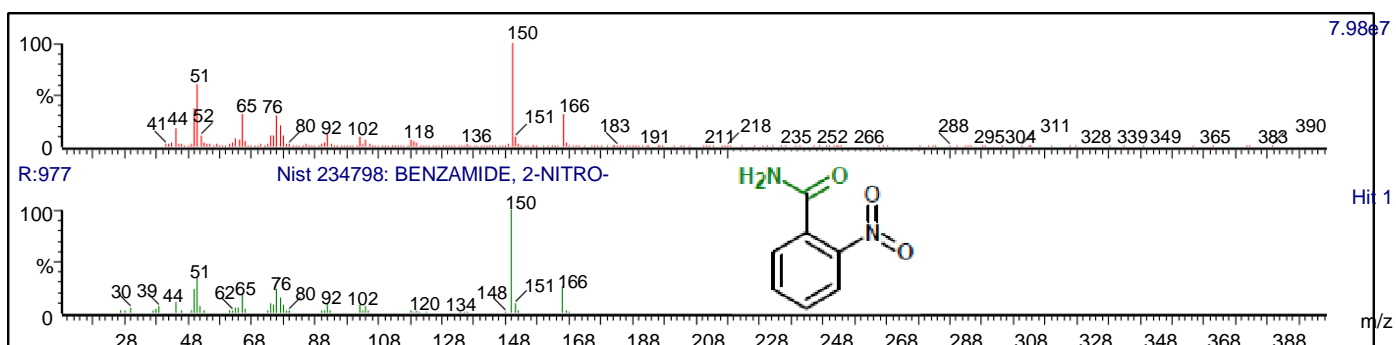

## GC spectra of Hydrogenated and Hydrated Products

Compound 1a (2-Chlorobenzenemethanol)

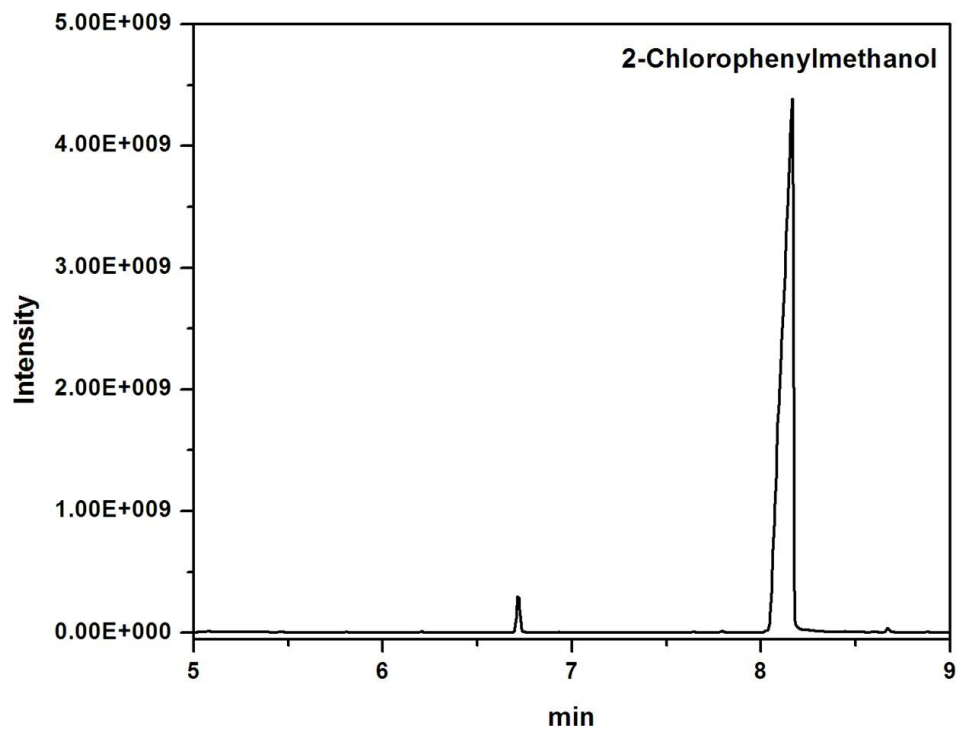

Compound 1c (2-Fluorobenzenemethanol)

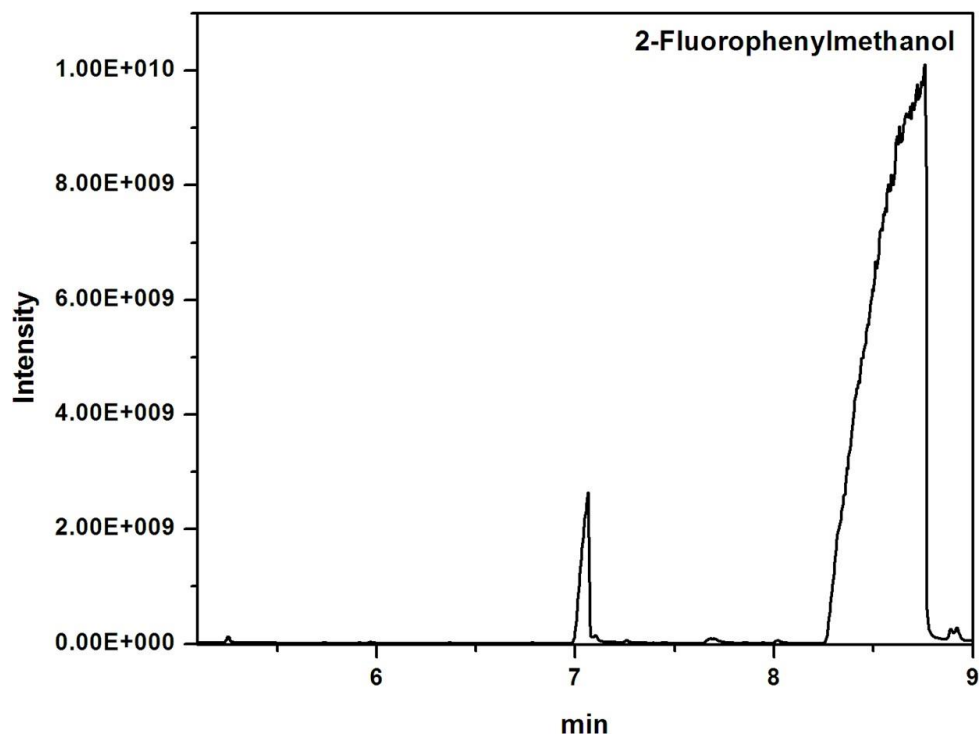

Compound 1e (4-Bromobenzenemethanol)

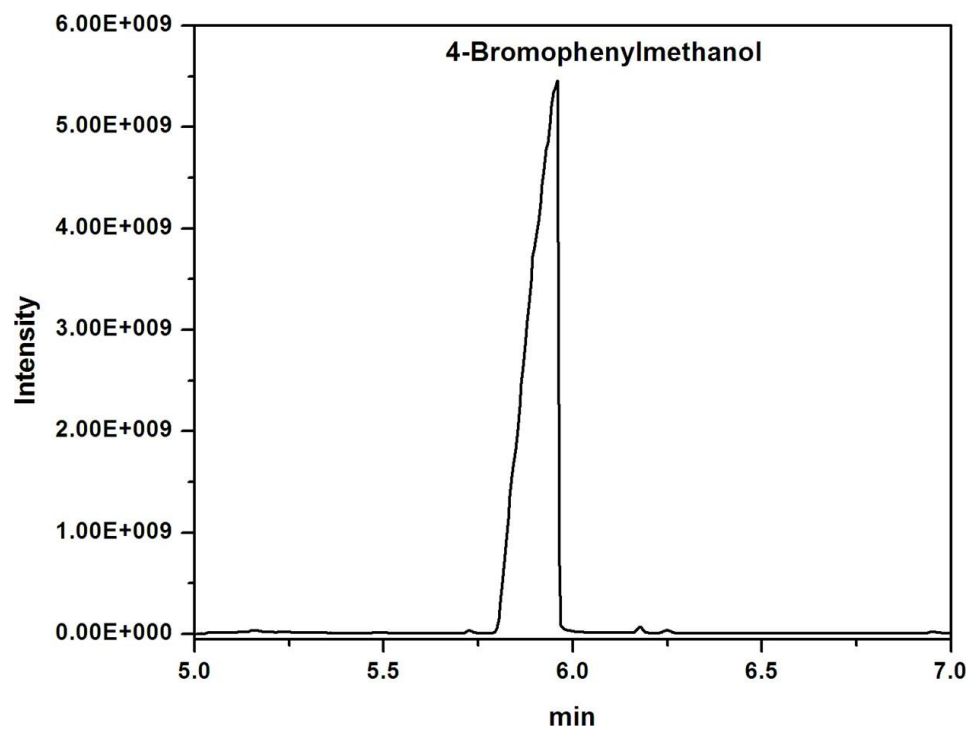

Compound 1i (3-Methylbenzenemethanol)

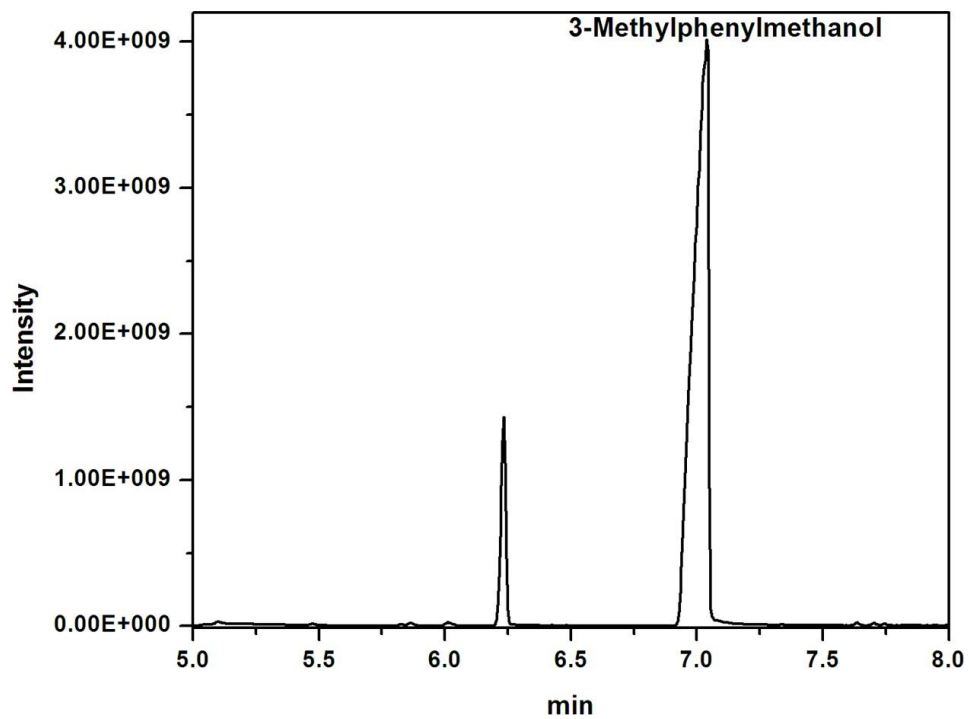

Compound 1k (4-Methoxybenzenemethanol)

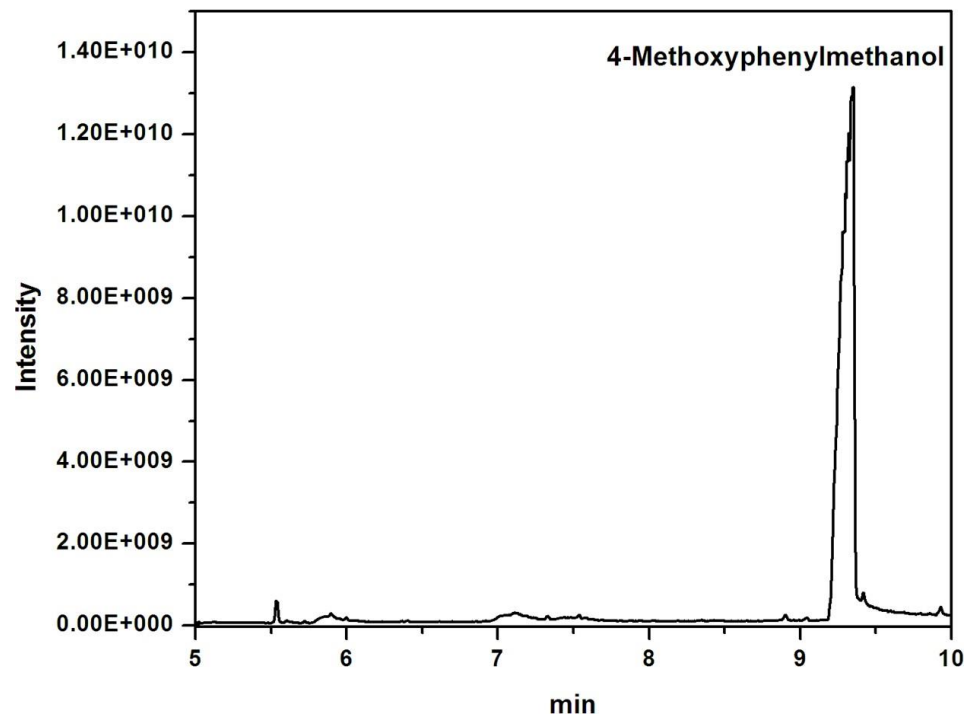

Compound 1m (2,4-Dimethoxybenzenemethanol)

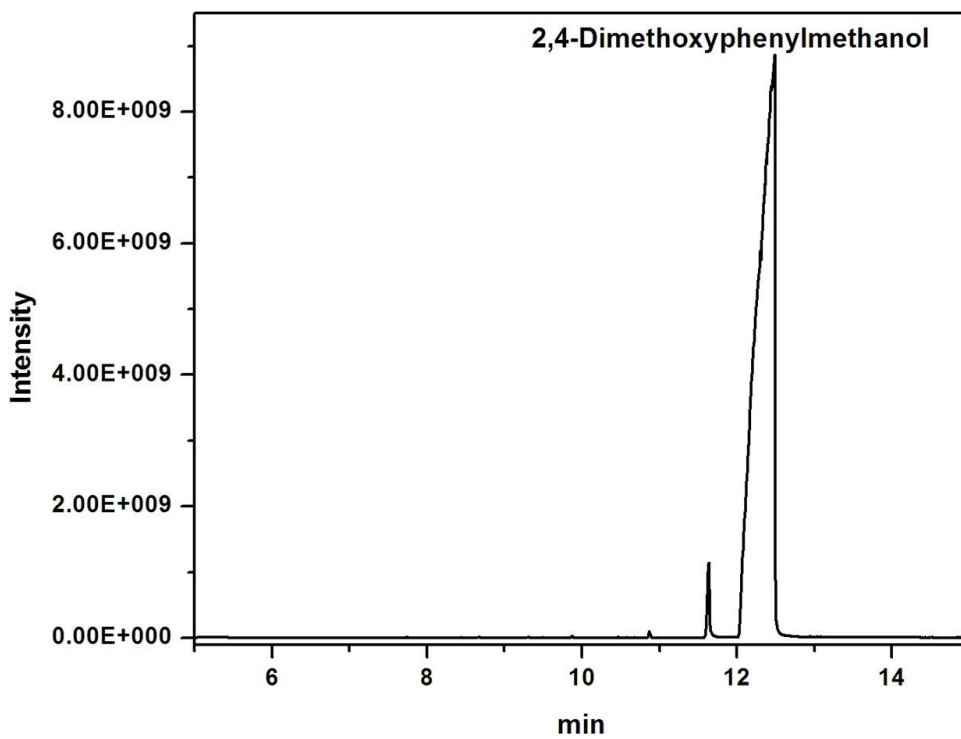

Compound 2a (Benzamide)

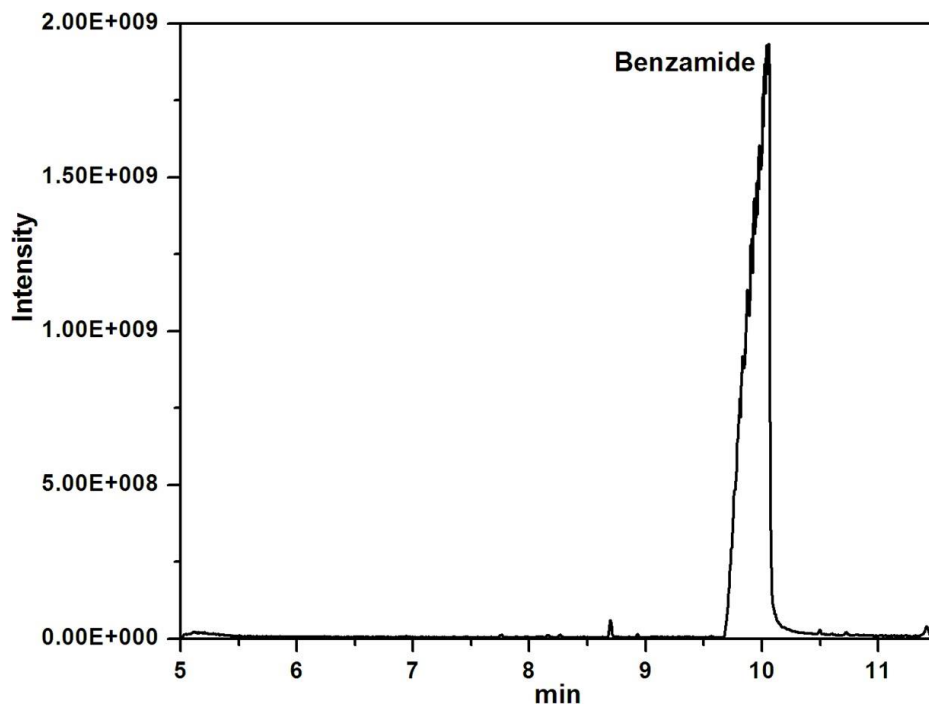

Compound 2c ( 4-Chlorobenzamide)

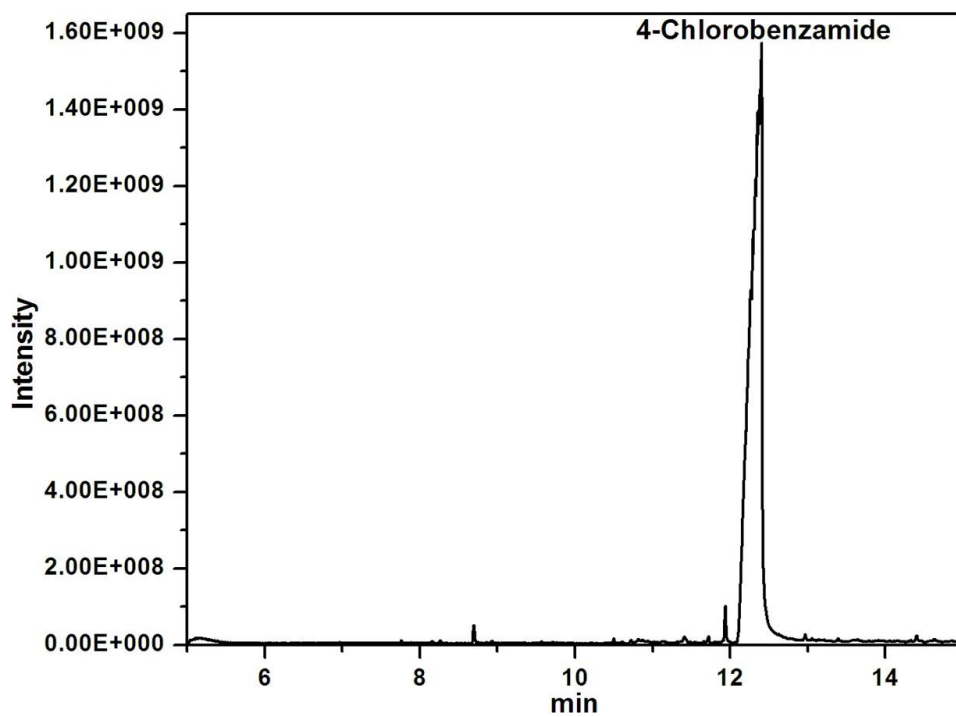

Compound 2f (4-Fluorobenzamide)

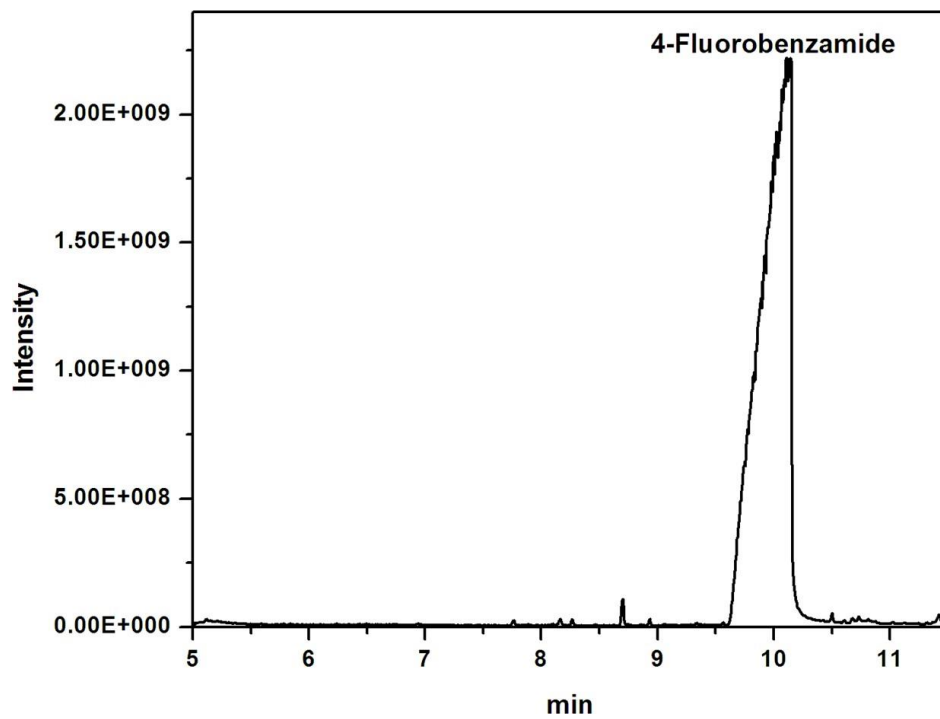

Compound 2g (2-Nitrobenzamide)

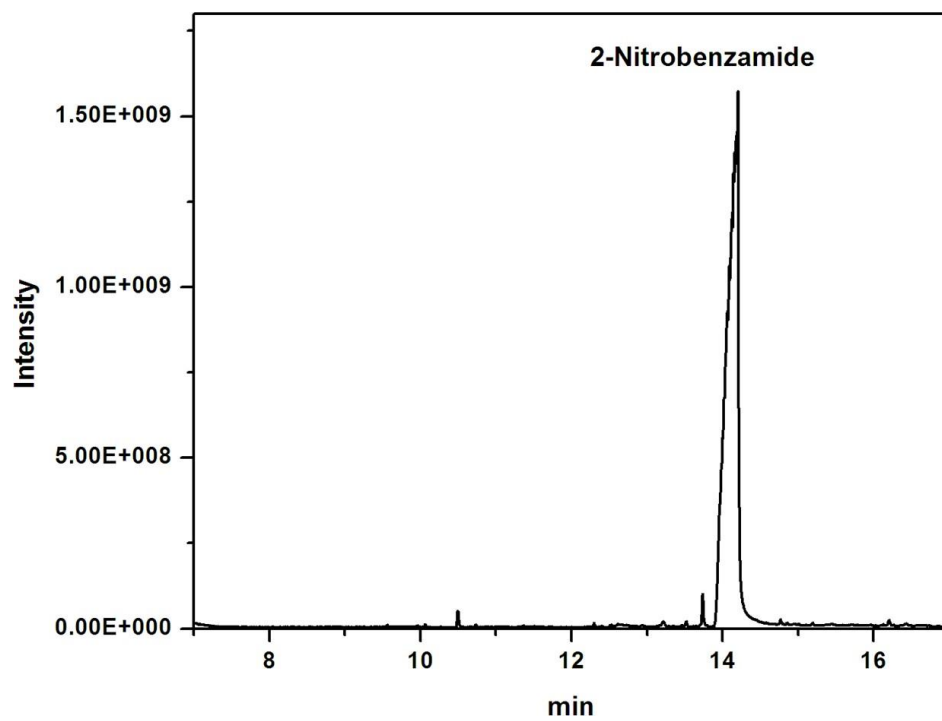

Supplement: c8nj03433h1.pdf [file c8nj03433h1.pdf]
